# Supplementary material for: Resilient phenotypes among bereaved youth: a comparison of trajectory, relative, and cross-domain approaches
Source: Springer Nature journal article supplement (doi:10.1186/s13034-023-00568-0), 2023-02-08
Supplement: MOESM1 [file 24011122]

Pregnancies Enrolled  
N=15,447

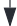

Foetuses  
N=15,658

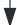

Children Alive at 1 Year  
N=14,901

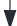

Mother Completed  
Questionnaire  
8 years 7 months  
N=8,304

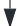

Mother Responded to  
Bereavement Question  
N=8,195

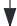

Youth Participated in Clinic  
at Age 17  
N=4,191

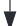

Youth has 3 SDQ and 3  
MFQ Measures  
N=3,766
