# Supplementary material for: Resilient phenotypes among bereaved youth: a comparison of trajectory, relative, and cross-domain approaches
Source: Springer Nature journal article supplement (doi:10.1186/s13034-023-00568-0), 2023-02-08

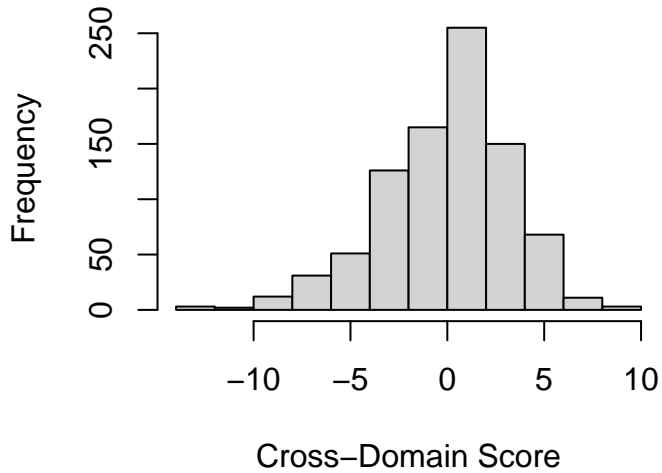

Supplement: MOESM5 [file 24011122]
